1 **Prasinovirus attack of *Ostreococcus* is furtive by day but savage**  
2 **by night.**

3

4 Evelyne Derelle<sup>§</sup>, Sheree Yau<sup>§</sup>, Hervé Moreau\* and Nigel H. Grimsley\*

5

6 <sup>§</sup>These authors contributed equally to this publication.

7

8 Integrative Marine Biology Laboratory (BIOM), CNRS UMR7232, Sorbonne  
9 Universities, Banyuls-sur-Mer, France

10

11 Running Head: Life-cycle of lytic infection in an algal virus

12

13 Address correspondence to: N.G. or H.M.

14

15

16

17

18

19 **Abstract**

20 Prasinoviruses are large DNA viruses that infect diverse genera of green microalgae  
21 worldwide in aquatic ecosystems, but molecular knowledge of their life-cycles is lacking.  
22 Several complete genomes of both these viruses and their marine algal hosts are now  
23 available and have been used to show the pervasive presence of these species in microbial  
24 metagenomes. We have analysed the life-cycle of OtV5, a lytic virus, using RNA-Seq  
25 from 12 time points of healthy or infected *Ostreococcus tauri* cells over a day/night cycle  
26 in culture. In the day, viral gene transcription remained low while host nitrogen  
27 metabolism gene transcription was initially strongly repressed for two successive time  
28 points before being induced for 8 hours, but in the night viral transcription increased  
29 steeply while host nitrogen metabolism genes were repressed and many host functions  
30 that are normally reduced in the night appeared to be compensated either by genes  
31 expressed from the virus or by increased expression of a subset of 4.4 % of the host's  
32 genes. Some host cells lysed progressively during the night, but a larger proportion lysed  
33 the following morning. Our data suggest that the life-cycles of algal viruses mirror the  
34 diurnal rhythms of their hosts.

35

36

37 Keywords: Phycodnaviridae, NCLDV, prasinophytes, Mamiellophyceae,

38

39

40

41

## 42 **Introduction**

43 The Mamiellophyceae is a class of eukaryotic unicellular green algae whose  
44 phylogenetically diverse members have been particularly successful in colonizing the  
45 world's Oceans (1, 2). Their tiny cell sizes (3), global dispersion and ease of laboratory  
46 culture (4, 5) render them attractive as models for interdisciplinary studies in marine  
47 biology. In addition, the complete genomes of several species in the genera *Ostreococcus*,  
48 *Bathycoccus* and *Micromonas* have been characterized (6), permitting their detection in  
49 metagenomic data collected in microbial fractions of environmental seawater fractions  
50 (1). Numerous species in this group of algae are infected by prasinoviruses (1, 7), large  
51 double-stranded DNA (dsDNA) viruses in the family Phycodnaviridae. While viruses  
52 infecting *Micromonas* spp. have been known for some time (8), those infecting  
53 *Ostreococcus* and *Bathycoccus* were discovered more recently (9–13). Several of these  
54 prasinoviral genomes have now been characterized, and are typically about 200 kb long,  
55 encoding about 250 genes.

56 In aquatic environments in general, viruses play an important role in regulating the  
57 population of diverse phytoplankton, and affect carbon and nutrient cycling by lysing  
58 susceptible host cells(14), but much remains to be discovered about their biology. In  
59 cyanobacteria, for example, diurnal regulation of host cell lysis has been observed (15–  
60 17). Phycodnaviruses are nucleo-cytoplasmic large DNA viruses (NCLDVs) that infect  
61 many species of eukaryotic algae. The best characterized of these are PBCV-1  
62 (*Paramecium bursaria Chlorella virus 1*), a species infecting freshwater *Chlorella*, that  
63 are also symbionts of the ciliate *Paramecium bursaria*, (18) and *Emiliana huxley*  
64 viruses(19) that infect the marine haptophyte unicellular alga *Emiliana huxleyi*, well-  
65 known for its extensive oceanic blooms.

66 The life-cycle of *Ostreococcus tauri* virus 5 (OtV5), with its typical icosahedral particle  
67 morphology, 8-hour long latent period and small burst size of 25, cultured with its host in  
68 continuous light, was first described by Derelle *et al* (9). Numerous studies describing

69 viral growth in related prasinoviruses infecting *Micromonas* have been made previously  
70 using a day-night cycle (20–27), and recently Demory *et al* (28) revealed temperature to  
71 be a key factor in these interactions, but detailed molecular analyses were not the main  
72 objective of these studies. In the present study, we aimed to re-examine growth of OtV5  
73 in a more natural light regime (12h light / 12h dark) and to characterize gene expression  
74 from the host and algal genomes by RNA-Seq transcriptomic analyses.

## 75 **Results**

### 76 **Growth of host cells and virus after infection at different times.**

77 A partial synchronization of *O. tauri* growth was previously reported under a 12:12  
78 light/dark (L:D) cycle (29). In these cultures, cells were in G1 phase during most of the  
79 light phase and progressively entered in S phase and mitosis at the end of the day. The  
80 division of the population occurred during a period of 2 hours before and 2 hours after the  
81 light to dark transition. In such synchronized cultures, the effect of inoculating cultures  
82 at different times during the day was thus tested in a preliminary experiment, to find the  
83 best time to inoculate the cultures. For that purpose, *O. tauri* cultures were infected with  
84 OtV5 every 2 hours during the light phase (Fig. 1). Cell lysis was almost complete at the  
85 end of the second day (36 hours later) when the infection occurred in the first 4 hours of  
86 the light period. In contrast, when infection occurred later, for example after 10-12 hours  
87 of light, no cell lysis was observed at 36 hours after the start of the experiment and lysis  
88 was delayed until the next day.

89 **Fig. 1** Time course of lysis of *O. tauri* cultures partially synchronized by a 12 h:12 h  
90 light:dark cycle and inoculated with OtV5 (MOI 5) at different times during the previous  
91 day, as indicated in the adjacent key. Note that almost complete lysis of cells occurred at  
92 36 hours post inoculation (hpi) only when cultures were inoculated on the previous day at  
93 8 am (time zero, filled squares with continuous line) or 10 am (time 2, fine dotted line  
94 with filled diamonds).

### 95 **Virus-host infection dynamics.**

96 In order to have a complete viral lysis cycle within two working days, we infected cells  
97 using a multiplicity of infection (MOI) of 10 per cell one hour after “dawn”, giving 11  
98 hours of light before the dark period. In these conditions, infected cells did not start to

99 lyse at 8 hours post inoculation (hpi) as observed previously under continuous light (9),  
100 but remained intact until after “nightfall”. Uninfected and infected cells started to divide  
101 at 7 hpi, but cell growth in infected cultures was strongly reduced after 9 hpi (Fig. 2).  
102 Control cells divided 7–17 hpi, doubling in cell density, but only about 40% of infected  
103 cells divided, reaching a maximum at 13 hpi, then declining slowly until 1 hour after  
104 “dawn”, when about 80% of the remaining cells lysed in the period 23–25 hpi  
105 (Supplemental Fig. S1A). By 27 hpi, the “infected” population was reduced to about 7%  
106 of the control.

107 **Fig. 2.** Growth curves of *O. tauri* cultures and OtV5. Open diamonds: uninfected  
108 *O. tauri*, open circles: *O. tauri* infected by OtV5 and open triangles: OtV5 production.

109

### 110 **Supplemental Fig. S1**

111 A: Visualisation of *O. tauri* cells by flow cytometry in healthy (control) or infected  
112 (inoculated at 0 hpi) from samples taken at different times during host and viral growth  
113 during the RNA-Seq analysis. Healthy *O. tauri* cells are seen as red fluorescent points  
114 clustering in the window shown, whereas lysing cells can be seen as dark points  
115 underneath the window with reduced fluorescence and side scatter that begin to appear in  
116 infected cultures at 9 hpi, becoming suddenly stronger at 25 hpi and rising to maximum at  
117 27 hpi.

118 B: Electropherograms of RNA extractions from in healthy (control) or infected  
119 (inoculated at 0 hpi) cultures on an Agilent 2100 Bioanalyzer, dark bands showing  
120 mainly abundant ribosomal RNAs. In infected cultures the extracted RNA is partly  
121 degraded after 23–27 hpi, when most of the host cells are lysing. M – molecular weight  
122 marker track.

123

124 In inoculated cultures, given that the MOI was 10, we observed that most viruses  
125 adsorbed to each cell immediately after inoculation, since the density of particles  
126 measured by flow cytometry appears to drop to a tenth of that in the inoculum. Few  
127 viruses were released from host cells by 9 hpi, but many more were released in the period  
128 9–13 hpi, and the viral population continued to increase until the end of the experiment,

129 when the total number of virus particles was 25–30× higher than the number of host cells  
130 inoculated at 0 hpi, in good agreement with the burst size of 25 calculated previously (9).

131 **Differentially expressed host genes.**

132 mRNAs of all samples were analysed using RNA-Seq technology and host and viral gene  
133 expression was compared at each time point between control and infected cells. With the  
134 parameters used in the analysis (see Methods), only 323 host genes were significantly  
135 differentially regulated at any one time point using the chosen analytical parameters  
136 (Table 1, “Methods” and Supplemental Table S1).

137

138 Table 1. Numbers of differentially expressed *O. tauri* genes.

|                                       | Total | Up  | Down | Up and down |
|---------------------------------------|-------|-----|------|-------------|
| Total                                 | 323   | 230 | 63   | 30          |
| DE only once                          | 207   | 151 | 56   | 0           |
| DE at least two non-consecutive times | 24    | 7   | 2    | 15          |
| DE at least two consecutive times     | 92    | 72  | 5    | 15          |

139 DE: differentially expressed, Up: all DE genes were up-regulated, Down: all DE genes were  
140 down-regulated, Up and Down: regulation of DE genes varied across the time course.

141

142

143 **Supplemental Table S1**

144 Host genes differentially expressed once or more between control and infected cultures at  
145 different times after inoculation. Log2-fold changes are shown only if the number of raw reads  
146 exceeds 100 in both control and infected treatments.

147 Given the high number of sampled time points in this experiment (24 mRNA libraries  
148 were sequenced), no replicates were done. To palliate this, only genes whose expression  
149 was differentially regulated at two or more consecutive sampling times were retained.  
150 Application of this criterion decreased to 92 the number of host genes which were  
151 considered to be regulated (Fig. 3 and Table 1).

152

153 **Fig. 3.** Differentially transcribed *O. tauri* genes during a 27-hour infection time course.  
154 Time (hpi) is shown along the abscissa, with time points sampled in the dark shown with  
155 a grey background, and rows represent DE genes clustered according to log<sub>2</sub>-fold  
156 changes in expression (Color Key)(see Supplementary Table S2 for a detailed list of  
157 genes).

158

159

160 **Supplemental Table S2**

161 Host genes differentially expressed at least 2 consecutive time points between control and  
162 infected cultures. Log<sub>2</sub>-fold ratios and FPKM values are shown for all time points.

163 *See Excel spreadsheet*

164

165 Most of them (72) were only up-regulated whereas 5 were only down-regulated. Fifteen  
166 other genes were also regulated in the opposite direction at least once in the course of the  
167 experiment, albeit 13 having a consecutive regulation at two successive times in the same  
168 orientation (up- or down-) (Table 1). Most of the regulated genes were individually  
169 dispersed in the genome except for a cluster of 7 genes, including the nitrate/nitrite  
170 transporter/reductase cluster previously described (30), and a group of genes on  
171 chromosome 19 (see below). Among the 92 genes, 77 (80%) had a potential identified  
172 function (Supplemental Table S2), but no clear metabolic pathways could be identified  
173 except for the nitrate/nitrite cluster mentioned above and present on chromosome 10  
174 (Supplemental Fig. S2). This tandem organisation indicated a possible selective pressure  
175 for optimization of nitrate uptake and assimilation by *O. tauri*, although experimental  
176 evidence for such a coordinated expression of these genes is currently lacking.

177 **Supplemental Fig. S2.** Distribution of *O tauri* differentially transcribed genes across the  
178 genome. Numbers underneath chromosome numbers indicate the number of genes  
179 encoded by that chromosome. Large black rectangles represent chromosomes, each  
180 rectangle being a composite view of the 12 time points during the OtV5 infection stacked  
181 from bottom to top. On chromosome 10, for example, the nitrogen simulation cluster of  
182 genes (blue arrowhead) can be seen as under-expressed (green), then over expressed  
183 (red), then under expressed in the final stages, reading from bottom to top of the  
184 rectangle.

185

186 Interestingly, in our experiment their expression was first strongly inhibited during at  
187 least the first hour post infection, then, up-regulated up to the same level of the control  
188 until 17 hpi, and, finally, again strongly inhibited (Fig. 3).

189 Ribosomal RNA gene transcripts were much more abundant in infected cells than in  
190 healthy cells during the infection process (Fig. 3).

191

### 192 **Early fluctuations in host transcript abundance.**

193 Disregarding the above requirement for DE in the same direction at two consecutive  
194 points, we observed that a small number of host genes showed up-down or down-up  
195 regulation at two early time points after infection. Eight genes showing DE at one time  
196 point were up-regulated at 0-1 hpi then down regulated (up-down) and 7 genes showed  
197 down regulation at 0 to 1 hpi then up regulation (data not shown). Most of these proteins  
198 are predicted to have regulatory functions (4 transporters, 3 nucleic-acid binding, 2  
199 transcription factors, 2 unknowns, 1 kinase, 1 ATPase).

### 200 **Expression of viral genes.**

201 All of the viral genes were expressed during the life-cycle, except for most of those  
202 present in the long terminal inverted repeats (TIRs). Clustering the data (Fig. 4) revealed  
203 successive functional groups of genes. The expression pattern of viral genes in infected  
204 cultures occurred in two phases (Fig. 4).



205 **Fig. 4.** Timing of OtV5 relative gene transcription during infection. Time (hpi) is shown  
206 along the abscissa, with time points sampled in the dark shown with a grey background.  
207 Rows represent OtV5 genes clustered according to the variation in their relative  
208 expression the over time (left dendrogram) and by the relative expression pattern of each  
209 sample (above dendrogram). The colour key shows regularised log (rlog) transformed  
210 gene fragment counts centred to the mean of each gene (row means). (see "Methods" and  
211 Supplemental Table S3 for a detailed list of genes).

212

### 213 **Supplemental Table S3**

214 Expression of OtV5 genes at different time points during the infection, grouped according their  
215 expression profiles (see also Fig. 4 and Methods). The genes in TIRs (4 genes at each end of the  
216 genome) showed no or negligible expression and were not included.

217 *See Excel spreadsheet*

218 Phase I from 0–9 hpi with low viral transcription (<6% of reads mapped to OtV5)  
219 corresponding to the start of cell division before the light/dark transition and phase II  
220 occurring after from 11–27 hpi with high viral transcription (up to 66% of reads mapped  
221 to OtV5). During the first phase in the light, two clusters of phase I genes (clusters 3 and  
222 1) stood out as more strongly expressed than others. Cluster 3 was strongest, concerning  
223 genes mainly involved in controlling transcription initiation and nucleotide processing,  
224 whereas cluster 1 contained a mixture of functions. Both of these clusters contained genes  
225 involved in DNA replication. The majority of phase II viral gene expression can be seen  
226 to occur probably when host DNA replication has been completed(29) at 13–23 hpi, in  
227 clusters 2 and 6, whereas clusters 8, 9 and 10 contain genes that are highly expressed very  
228 late in infection. Phase II also contains genes classically involved in late virus particle  
229 development, such as major capsid protein-like (MCP), viral A inclusion body protein  
230 and virion packaging ATPase. At the end of phase II, all viral genes were expressed,  
231 except for 3 of the 4 genes in each TIR (Supplemental Figure S3).

### 232 **Supplemental Fig. S3**

233 The distribution of transcript abundance (FPKM) of OtV5 genes during the time course  
234 of infection (hpi shown on right). The OtV5 genome is represented from left to right, one  
235 gene per column on the heat map. Six out of 8 of the genes in the terminal inverted  
236 repeats (TIR) were not expressed, so that blue columns appear at genome extremities.

237

238 The most expressed viral gene was annotated as a 33 kDa *in vitro* peptide translation  
239 (Supplemental Table S3) whose function is not clear but which was also been reported to  
240 be massively expressed in the closely related Chlorella viruses(31). This gene was highly  
241 expressed throughout the infection. Among the 8 major capsid protein (MCP)-like genes,  
242 copies 1–7 began to be expressed late in the second phase, between 23 and 25 hpi,  
243 whereas copy 8 was expressed earlier (Fig. 4, Supplemental Table S3).

244 Several genes with similar predicted functions are present in both the virus and the host  
245 genomes. The regulation of their respective expressions showed two patterns. The first  
246 pattern showed highest expression of the host gene during the light phase and highest  
247 viral gene expression in the dark, when the host gene counterpart expression was low.  
248 The virus thus appeared to be autonomous for some of the functions necessary for its  
249 growth in the night (Fig. 5). For example, this was observed for the two subunits of the  
250 ribonucleotide reductase and for the DNA polymerase (Fig. 5). In the second pattern, the  
251 expression of the host genes was inhibited in the infected cells compared to the control  
252 whereas the virus genes were expressed (Fig. 5), again appearing as a compensation of  
253 the host gene inhibition. This is illustrated by the asparagine synthase gene (Fig. 5) but  
254 was observed for several other genes such as the proline dehydrogenase and the  
255 acetolactate synthase.

256 **Fig. 5.** Expression (ordinates: FPKM) of healthy (square data points, darker colours),  
257 infected (triangular data points, lighter colours) *O. tauri* and OtV5 (diamonds, dashed  
258 lines) genes sharing a similar putative function. Abscissae: time (hours post-inoculation).  
259 Inoculation with the virus was done at  $t = 0$ , one hour after daytime (light) started. The  
260 grey shaded area indicates the night (dark) period. Genes are identified by their accession  
261 numbers in public databases (top left in each panel, +V: virus-inoculated cultures).

262

## 263 **Discussion**

264 Several previous detailed reports on the life-cycles of large DNA viruses infecting green  
265 microalgae have been done in continuous illumination (9, 32–36), which promotes rapid  
266 growth of the host and virus, but since all of these algae have evolved in a diurnal cycle,  
267 we decided to perform this study in a 12h light and 12h dark “day” and “night” cycle. In  
268 healthy cells, under these conditions, the general pattern of gene transcription is quite  
269 different in the daytime, when photosynthesis is in progress, and in the night, when stored  
270 energy is being used, this rhythm being observed both in the laboratory (37) and in the  
271 environment (38).

272 Whereas under continuous illumination there was a burst of viruses released at 8 hpi (9),  
273 in the light-dark cycle, the timing of the host cell lysis was variable, with some cells  
274 lysing during the night, but most of the cells dying after illumination of the cells the  
275 following morning (Fig. 2). Under these conditions, it does not really make sense to think  
276 of the “burst” time as a fixed period. It probably also varies according to the temperature  
277 and in nature, the seasons in temperate latitudes. Several authors have investigated the  
278 effects of host cell cycle (39) or different environmental variables on viral life-cycles (20,  
279 40–43), but appropriate tools were not available or not used for molecular analyses in  
280 these species. Using gene-specific probes or biochemical analyses, *E. huxleyi* viruses  
281 were shown to affect certain host metabolic pathways(44, 45), but diurnal variations were  
282 not discernible in this system. Our observations agree well with those of Brown et al (22)  
283 on the related prasinovirus *Micromonas* virus MpV-Sp1, who observed a peak of viral  
284 production about 24 h after infection. Furthermore, these authors showed that host cell  
285 lysis was delayed in prolonged dark periods and confirmed their observations on host cell  
286 densities and virus production using molecular probes.

287 In natural populations of phytoplankton as in culture, cell growth responds strongly to  
288 light/dark periodicity (38, 46). Our data support the notion that viral gene transcription is  
289 rather quiescent during the day and increases rapidly at the onset of the dark when host  
290 DNA replication is being completed, thereafter remaining strongly expressed. Many of  
291 the genes that were significantly expressed in the quiescent phase are abundant in the  
292 active later phases, suggesting that their quiescent expression may reflect to some extent  
293 leaky general suppression levels. However, the heat map clustering revealed that viral

294 genes for nucleic acid processing and transcription do appear to be more abundant than  
295 other messages in the first phase (Fig. 4, clusters 1 and 3), although these genes continue  
296 to be expressed among the late genes. For example, transcription factor IIB (TFIIB), a  
297 conserved gene in eukaryotes and many large DNA viruses that is part of the core  
298 transcriptional machinery (47) was very highly expressed in the night (Fig. 5). In the  
299 night, viral genes probably essential for the late stages of viral growth appeared to  
300 compensate for gene functions that were normally turned down in the night, including  
301 functions probably important for DNA replication and amino acid metabolism, while  
302 transcripts likely encoding virion assembly and glycosylation were highest in the latest  
303 time points (Figs. 4 and 5). Although only arginine synthase and proline oxidase showed  
304 significantly different levels between control and infected at one time point  
305 (Supplemental Table S1), insufficient for our requirement of consecutive times, the  
306 strength the coordinate swings in expression shown in Fig. 5 for 16 genes clearly  
307 intimates that viral metabolism predominates, justifying our approach of numerous  
308 sampling times. Some host amino acid synthesis genes normally expressed in the dark  
309 were turned down in the dark in virus-infected cultures, but their viral counterparts were  
310 then up-regulated (Fig. 5). Viral proline oxidase was probably acquired from its host  
311 genome (9), is known to produce ATP during stress responses in eukaryotes (48, 49), and  
312 is a possible source of energy for the virus. Phosphofructokinase is a key enzyme  
313 controlling the production of energy through glycolysis(50) and viral transcript levels in  
314 the night rose to over an order of magnitude higher than those of the host (Fig. 5).

### 315 **Ribosomal RNA overexpression**

316 Although our extraction procedure was designed to isolate polyadenylated messenger  
317 RNA, some ribosomal RNA genes (rRNA), which are always abundant in RNA  
318 extractions of active cells, were represented in our data. There is increasing evidence that  
319 rRNA transcripts can be polyadenylated in eukaryotes, including algae in the same  
320 phylogenetic order as *Ostreococcus*, such as *Micromonas* (51). rRNAs were  
321 over-represented late in infection in *O. tauri*, compared with the control. At least three  
322 explanations are possible for this. Firstly, it may result because the ribosome is a large  
323 and relatively stable subcellular structure that might persist better than the other

324 cytoplasmic RNAs during the late viral infection thereby preferentially protecting  
325 ribosomal RNAs that lie buried within it. Much of the available cellular RNA pool is  
326 likely to be used by the viral ribonucleoside-diphosphate reductase, an enzyme with two  
327 subunits that all prasinoviruses encode, to permit synthesis of prasinovirus DNA. This  
328 viral enzyme continued to be highly expressed during the night (Fig. 5), when the  
329 equivalent host genes were shut down. Secondly, an over-expression of ribosomal RNA  
330 may be induced by the virus. U3, an RNA probably transcribed by RNA polymerase III  
331 (52) and essential for the first step of pre-rRNA processing (53) is apparently  
332 overexpressed during late viral infection. *O. tauri* RNA pol III is normally constitutively  
333 expressed as it required for many basic cellular functions (54), and indeed there is no  
334 significant difference observed in the expression of its controlling repressor,  
335 *ostta05g03220*, that encodes the orthologue of Maf1(55). The apparent abundance of U3  
336 suggests that it may not be dislodged from the ribosomal RNA for processing. The  
337 proteins UTP14 and DHR1 are required to dislodge U3, (56), but in *O. tauri* the putative  
338 orthologues of these genes (*ostta04g00770* and *ostta05g03760*, respectively) are not  
339 induced. Only 3 of the 161 annotated *O. tauri* ribosomal proteins were modestly  
340 over-expressed at one time point, the other being under-expressed (Supplemental Table  
341 S4). This would thus result in overproduction of unprocessed host ribosomal RNA  
342 precursors, potentially providing OtV5 with a rich source of nucleic acids by their  
343 degradation. Thirdly, in yeast, where the dynamic, energetically demanding and complex  
344 process of ribosome biogenesis has been studied in detail (57), nutrient starvation or  
345 stress are known to shut down the synthesis of ribosomes *via* the conserved global  
346 regulatory TOR (target of rapamycin) pathway at the stage of initiation of transcription or  
347 pre-rRNA (57, 58). However, in our system rRNA appears to accumulate and its  
348 processing occurs in an apparently normal way up to 23 hpi (Supplemental Fig. S1).  
349 Recently Kos-Braun et al (59), demonstrated an alternative pathway for blockage of  
350 rRNA processing at a later stage at during the diauxic growth phase in yeast. When  
351 glucose is no longer available casein kinase 2 (CK2, an orthologue of *ostta12g02550* in  
352 *O. tauri* (60)) can phosphorylate TOR1, and partly processed rRNA products can  
353 accumulate in a resting (G1 or G0) stage. While this type of control also leads to  
354 accumulation of rRNA, Kos-Braun et al show that the 5S moiety in yeast remains

355 attached to the large rRNA subunit precursor, whereas in *O. tauri* the accumulated rRNA  
356 look normal.

357 **Supplemental Table S4**

358 Transcript abundancies (FPKM) for all host genes at different times in healthy control cultures  
359 (light blue background) and cultures inoculated with OtV5 at time zero (light red background)

360 While our data favour the second hypothesis, further work is required to study this  
361 process in more detail, since it may be a pivotal switch governing acquisition of sufficient  
362 cellular metabolites to resource the biosynthesis of large viral genomes before the host  
363 cell bursts. A least two of the control steps of host rRNA production might occur by  
364 protein phosphorylation (phosphorylation of TOR by its controlling proteins either at the  
365 stage of pre-RNA initiation or at a later stage (59)), and were out of the scope of the  
366 current study. More precise analysis of processing at the 5' part of the pre-rRNA (the  
367 position of U3 binding) would also be desirable.

368 **Nitrogen assimilation**

369 The uptake and conversion of nitrate to its reduced form required for synthesis of amino  
370 acids is a complex and energetically demanding process (61). The expression of genes  
371 involved in the assimilation of nitrate, the only source of nitrogen in our culture medium,  
372 and many others of the N assimilation pathway, are strongly differentially expressed  
373 throughout the course of infection, being firstly repressed, then induced and finally  
374 repressed (Fig. 3 and Supplemental Fig. S2). These include numerous genes clustered  
375 together on chromosome 10 and a few genes scattered on other chromosomes. This is  
376 striking, because it is not related to the nitrogen sources available in the medium. In  
377 addition, the none of the 3 cyclin-dependent protein kinase genes shown to be involved N  
378 assimilation responses(62) showed differential expression, suggesting that this response  
379 is not functioning. There is an adequate level of nitrate in the culture medium used, (no  
380 ammonium provided in L1, see “Methods”), so nitrate uptake and nitrate reductase genes  
381 should be highly active, as they are in the control. There are several possible  
382 non-mutually exclusive reasons for this repression, which might either be initiated as a  
383 host defence response or be the result of a virally encoded products influencing N  
384 assimilation by this pathway.

385 Reduction of nitrate via nitrate reductase also leads to production of nitric oxide (NO)(63,  
386 64), a signalling reactive oxygen species (ROS) active in diverse species (65, 66),  
387 including algae (61) that is known to heighten the cellular defence responses of cells to  
388 stress (66–68). It is required for resistance to viruses in of *Arabidopsis* (69) and rice (70)  
389 and ROS are also known to modulate the response of *E. huxleyi* to viruses(45). Since the  
390 Nitrogen and Carbon / Phosphorous ratio for small green algal structural and metabolic  
391 requirements far exceeds that of the nucleic-acid rich large DNA viruses (71) and the cell  
392 is doomed to lyse, it may be advantageous for the virus to divert the resources usually  
393 used for protein synthesis towards nucleic acid synthesis, at the same time lowering the  
394 chance of detection by NO signalling that would initiate host defences. If the TOR  
395 complex is targeted by the virus as suggested above, and as shown recently in other host-  
396 pathogen systems (72, 73) this might also lead to TOR-controlled repression of the  
397 nitrogen assimilation genes (74). The coordinated regulation that we observed suggests  
398 the involvement of a global regulator, with opposing forces governing this control,  
399 provoking a strongly fluctuating response. However, the recent demonstration that  
400 certain prasinoviruses have acquired host genes that permit uptake of reduced  
401 nitrogen(75) suggests that this resource may also be limiting during infection, and favours  
402 the notion that suppression of NO signalling is the reason for decreasing the uptake of  
403 nitrate.

#### 404 **Is the replicative form of OtV5 chromatinized?**

405 In several other host-virus systems, chromatinization of viral DNA that enters the nucleus  
406 is known to occur rapidly once the viral DNA enters the nucleus (76–78). The replicative  
407 form of OtV5 has not yet been investigated, but it very likely has a nuclear phase during  
408 its infection cycle as OtV5 lacks a DNA-dependent RNA polymerase to transcribe viral  
409 genes (9). Herpes Simplex Virus (HSV) for example, is a dsDNA virus that probably  
410 replicates in the nucleus and is packaged in capsids as a linear molecule in the cytoplasm.  
411 During the HSV lytic cycle the viral genome circularizes and nucleosomes form along its  
412 genome (79) in a highly dynamic way that is modulated by a viral transcription factor  
413 (80). The strong induction of all host histone core genes observed throughout the OtV5  
414 life-cycle strongly suggests that the OtV5 genome is chromatinized during replication of

415 the viral genome, and that viral replication continues throughout the dark cycle, when  
416 many photosynthesis-dependent host processes are shut down (81). Host  
417 S-adenosylmethyltransferase, an enzyme required for the majority of processes that  
418 modify DNA, RNA, histones and other proteins, including those affecting replication,  
419 transcription and translation, mismatch repair, chromatin modelling, epigenetic  
420 modifications and imprinting (82), was overexpressed in a similar way, suggesting that  
421 any of these pathways might be induced during viral infection. Its continued expression,  
422 also during the night, is likely necessary for the numerous pathways required for virus  
423 production.

#### 424 **Induction of reverse transcriptase**

425 The *O. tauri* reverse transcriptase gene ostta08g00390 was strongly induced (over 4  
426 consecutive time points, and up to 420-fold at 13 h post-inoculation, (Fig. 3,  
427 Supplemental Table S2), during the period when cell division is expected to occur (at the  
428 end of the day, from 2 h before dark then for the following 6 h). This gene is the  
429 predicted replicase/integrase of a putatively complete type I transposon (30, 83, 84) that  
430 is not usually active in healthy *O. tauri* cells. At 7-13 hpi we observed a strong increase  
431 in the transcription of this gene. We hypothesize that the increase in transcription of this  
432 reverse transcriptase may be activated by the cellular stress response caused by OtV5  
433 attack, that may in turn activate transposition itself and the repeat retrotransposon in  
434 miniature (TRIM) on chromosome 19, leading to chromosomal rearrangements and  
435 possibly to activation of certain genes on chromosome 19 whose expression continues  
436 late in infection in those cells that subsequently become resistant to viral attack. Yau et al  
437 (2016)(84) observed rearrangements on chromosome 19 and overexpression of genes on  
438 this chromosome in cell lines that had become resistant to OtV5 infection, and the  
439 karyotypes of these strains also suggest possible rearrangements and/or translocations on  
440 chromosomes 19. This may additionally explain the presence of DNA very high in the  
441 PFGE gel since long reads of that chromosome by reverse transcriptase from transposon  
442 LTR might generate DNA intermediates that would not enter the gel (85–87). Recently,  
443 Blanc-Mathieu et al(88) revealed astonishing variability in the structure of chromosome  
444 19 in natural populations of *O. tauri*. Whether or not rearrangements of this chromosome



445 contribute to the acquisition of viral resistance is not yet clear, and will be a subject for  
446 future investigations.

### 447 **Host genes induced very late**

448 While most of the host and viral differentially expressed genes showed increased  
449 transcription just after the beginning of the night time (Fig. 3), a time when we expect  
450 host DNA replication to be underway, surprisingly, a few host genes showed a second  
451 period of induction very late in infection, during the 2<sup>nd</sup> half of the night and morning of  
452 the next day, 17–27 hpi. Since several of them were also observed to be induced in  
453 OtV5-resistant lines of *O. tauri* (84) we compared the host genes identified in both  
454 experiments as being differentially expressed. Twenty-six genes were found to be  
455 differentially expressed at some stage in both of the analyses, and the expression of 11 of  
456 them were strongly up-regulated in the last 13–27 hpi of the experiment. Since the  
457 majority of these genes (6/11) were located on the viral immunity chromosome first  
458 described by Yau et al (84), we hypothesize that this expression originates from a  
459 sub-population of resistant cells that have differentiated from the bulk of the susceptible  
460 cells, the latter being condemned to lyse and release viral progeny.

461 In summary, we have shown that in a natural light regime the life-cycle of prasinoviruses  
462 in *Ostreococcus* in culture is biphasic, remaining quiescent by day but becoming  
463 full-scale at night, when new virus particles arise steadily at first and then rather suddenly  
464 in the morning. During the night 239/247 (96.8%) of predicted viral genes are  
465 transcribed, and 323/7749 (4.2%) host genes are differentially expressed at some stage,  
466 the great majority (71%) being up-regulated, in response to the viral attack. However, the  
467 pattern of host gene expression in the final phase of infection already suggests that a  
468 small population of host cells were adapting to become founders for resistance to OtV5.  
469 Detailed knowledge of host-virus interactions will be necessary for advancing our  
470 understanding of the everlasting war between hosts and their viruses in aquatic  
471 environments.

## 472 **Methods**

### 473 **Culture conditions and growth measurements.**

474 The host strain *Ostreococcus tauri* RCC4221 (30, 83, 89) and the prasinovirus OtV5 (9)  
475 were used in all experiments. Cultures were grown in L1 medium (Bigelow Laboratory,  
476 NCMA, USA) diluted in 0.22  $\mu\text{m}$  filtered seawater under a 12/12 light/dark cycle (100  
477  $\mu\text{mole photon/m}^2\text{s}^{-1}$ ). Cell and viral counts were performed on a FACScan flow  
478 cytometer (Becton Dickinson, San Jose, CA, USA). *O. tauri* cells were counted according  
479 to their right-angle scatter and their red fluorescence emission due to the chlorophyll A  
480 pigment (90). OtV5 counts were determined by their right-angle scatter and their  
481 fluorescence after SYBR green I staining (91). For preparation of large quantities of  
482 viruses, five litres of an *O. tauri* exponentially growing culture (approx.  $5 \cdot 10^7$  cells. $\text{ml}^{-1}$ )  
483 was inoculated with an OtV5 lysate. Lysed cultures were centrifuged at 8000  $g$  for 20  
484 min at 20°C and then passed sequentially through a 0.22  $\mu\text{m}$  filters to remove large  
485 cellular debris. Virus filtrates were concentrated by ultrafiltration with a 50K MW size  
486 cut-off unit (Vivaspin 15 Turbo, Sartorius) to a final volume of 5 ml. Concentration of  
487 infectious particles was determined by a serial dilution assay.

488 To test for the effect of viral infection at different times during the day, *O. tauri* cultures  
489 in exponential growth phase were infected with purified OtV5 at a multiplicity of  
490 infection (MOI) of 5 and cell counts measured over 48 h.

491 To perform the differential expression analysis, an *O. tauri* culture was acclimatised such  
492 that cell density doubled every day from  $10^7$  to  $2 \cdot 10^7$  cells/mL by flow cytometer  
493 counting and diluting the culture daily for 10 days. After this period of acclimation to  
494 maintain cultures in this rhythm of growth, 1.5 L of *O. tauri* culture was prepared,  
495 counted by flow cytometry, adjusted to a cell concentration of  $10^7$  cells  $\text{ml}^{-1}$  by addition  
496 of L1 medium and half of the culture was infected with OtV5 one hour after the  
497 beginning of the light phase with OtV5 at a MOI of 10. The cultures were then split into  
498 control and infected, comprising  $12 \times 100$  mL flasks for each condition. At 12 different  
499 times between 0 and 27 hours post inoculation (hpi), control and infected flasks were  
500 sampled to measure cell and viral densities by flow cytometry and cells harvested for  
501 RNA extraction (Fig. 2 and S1).

502

### 503 **RNA extraction and sequencing.**

504 For RNA extraction, 50ml of cells were harvested by centrifugation at 8,000 g for 20 min  
505 at 20°C. The pellets were then flash frozen in liquid nitrogen and stored at -80°C. Total  
506 RNA was extracted using the Direct-zol™ RNA kit (Zymo Research), and checked for  
507 quality (Supplemental Table S1B). Selection for polyadenylated RNA, library preparation  
508 and sequencing was performed commercially (GATC Biotech AG., Konstanz, Germany).  
509 RNA libraries were sequenced on the Illumina Hi-Seq 2000 platform by multiplexing all  
510 samples on a single flowcell lane, which generating paired end reads of 101 bp in length.  
511 RNA sequence reads were checked for quality using FastQC.

### 512 **Differential gene transcription analysis.**

513 Transcriptome read pairs (fragments) were aligned using TopHat2 (92)(alignment  
514 parameters: -i 17 -I 3500, -G) to the annotated genome sequence of *O. tauri*  
515 RCC4221(83) and OtV5 (9). The counts of fragments aligning to each gene were  
516 determined using the htseq-count function of HTSeq (93) with parameters (-m  
517 intersection-nonempty). Fragments per kilobase of exon per million reads mapped  
518 (FPKM) were calculated for visualization of the expression of individual genes of interest  
519 and of OtV5. Differential gene expression analysis and data visualisations were  
520 performed in the R statistical environment (<https://www.r-project.org/>). Differential host  
521 gene expression analyses were performed on fragment count tables using the R package  
522 DESeq(93) to detect genes involved in OtV5 infection. Host gene transcription from each  
523 sampling time point was compared between control uninfected and infected cells using  
524 the DESeq function accepting genes as significantly differentially transcribed with  
525 adjusted p-value < 0.1. Candidate host genes involved in viral infection were accepted if  
526 > 100 reads were assigned to the gene and if they were differentially transcribed in at  
527 least two consecutive time points. Heatmaps and hierarchical clustering (euclidean  
528 distance) were produced using heatmap.2 on the log<sub>2</sub>-fold change values of *O. tauri* DE  
529 genes and the row means centred regularised log (rlog) (from DESeq2 function)  
530 transformed fragment counts of OtV5 genes with non-zero fragment counts. OtV5  
531 clusters of genes that covaried in their relative expression over time were designated  
532 using the cuttree function at h=5.

533

534

535 **Accession numbers.**

536 *O. tauri* RCC4221 chromosome sequences can be found under the GenBank accession  
537 numbers CAID01000001.2 to CAID01000020.2 and gene annotations are also available  
538 from the Online Resource for Community Annotation of Eukaryotes (ORCAE) under  
539 *Ostreococcus tauri* V2. The updated genome sequence and annotation of OtV5 is  
540 available under GenBank accession EU304328.2. Transcriptomic data used in this study  
541 is available under project accession PRJNA400530.

542

543 **References**

544

- 545 1. Sheree Yau, Grimsley NH, Moreau H. 2015. Molecular ecology of Mamiellales and  
546 their viruses in the marine environment. *Perspectives in Phycology* 2:83–89.
- 547 2. Monier A, Worden AZ, Richards TA. 2016. Phylogenetic diversity and biogeography  
548 of the Mamiellophyceae lineage of eukaryotic phytoplankton across the oceans.  
549 *Environmental Microbiology Reports* 8:461–469.
- 550 3. Vaultot D, Eikrem W, Viprey M, Moreau H. 2008. The diversity of small eukaryotic  
551 phytoplankton ( $\leq 3 \mu\text{m}$ ) in marine ecosystems. *Fems Microbiology Reviews*  
552 32:795–820.
- 553 4. Vaultot D, Le Gall F, Marie D, Guillou L, Partensky F. 2004. The Roscoff Culture  
554 Collection (RCC): a collection dedicated to marine picoplankton. *Nova Hedwigia*  
555 79:49–70.
- 556 5. Lelandais G, Scheiber I, Paz-Yepes J, Lozano J-C, Botbol H, Pilátová J, Žárský V,  
557 Léger T, Blaiseau P-L, Bowler C, Bouget F-Y, Camadro J-M, Sutak R, Lesuisse E.

- 558 2016. *Ostreococcus tauri* is a new model green alga for studying iron metabolism in  
559 eukaryotic phytoplankton. BMC Genomics 17:319.
- 560 6. Grimsley NH, Thomas R, Kegel JU, Jacquet S, Moreau H, Desdevises Y. 2012.  
561 Genomics of Algal Host-Virus Interactions. Advances in Botanical Research  
562 64:343–381.
- 563 7. Weynberg KD, Allen MJ, Wilson WH. 2017. Marine Prasinoviruses and Their Tiny  
564 Plankton Hosts: A Review. Viruses 9:43.
- 565 8. Mayer JA, Taylor FJR. 1979. Virus Which Lyses the Marine Nanoflagellate  
566 *Micromonas pusilla*. Nature 281:299–301.
- 567 9. Derelle E, Ferraz C, Escande M-L, Eychenie S, Cooke R, Piganeau G, Desdevises Y,  
568 Bellec L, Moreau H, Grimsley N. 2008. Life-cycle and genome of OtV5, a large  
569 DNA virus of the pelagic marine unicellular green alga *Ostreococcus tauri*. PLoS  
570 ONE 3:e2250, 1–13.
- 571 10. Weynberg KD, Allen MJ, Ashelford K, Scanlan DJ, Wilson WH. 2009. From small  
572 hosts come big viruses: the complete genome of a second *Ostreococcus tauri* virus,  
573 OtV-1. Environmental Microbiology 11:2821–2839.
- 574 11. Weynberg KD, Allen MJ, Gilg IC, Scanlan DJ, Wilson WH. 2011. Genome Sequence  
575 of *Ostreococcus tauri* Virus OtV-2 Throws Light on the Role of Picoeukaryote  
576 Niche Separation in the Ocean. J Virol 85:4520–4529.

- 577 12. Moreau H, Piganeau G, Desdevises Y, Cooke R, Derelle E, Grimsley N. 2010.  
578 Marine Prasinovirus Genomes Show Low Evolutionary Divergence and Acquisition  
579 of Protein Metabolism Genes by Horizontal Gene Transfer. *J Virol* 84:12555–  
580 12563.
- 581 13. Derelle E, Monier A, Cooke R, Worden AZ, Grimsley NH, Moreau H. 2015.  
582 Diversity of Viruses Infecting the Green Microalga *Ostreococcus lucimarinus*. *J*  
583 *Virol* 89:5812–5821.
- 584 14. Brum JR, Sullivan MB. 2015. Rising to the challenge: accelerated pace of discovery  
585 transforms marine virology. *Nat Rev Micro* 13:147–159.
- 586 15. Clokie MRJ, Millard AD, Mehta JY, Mann NH. 2006. Virus isolation studies suggest  
587 short-term variations in abundance in natural cyanophage populations of the Indian  
588 Ocean. *Journal of the Marine Biological Association of the United Kingdom*  
589 86:499–505.
- 590 16. Kimura S, Yoshida T, Hosoda N, Honda T, Kuno S, Kamiiji R, Hashimoto R, Sako Y.  
591 2012. Diurnal Infection Patterns and Impact of Microcystis Cyanophages in a  
592 Japanese Pond. *Appl Environ Microbiol* 78:5805–5811.
- 593 17. Kao CC, Green S, Stein B, Golden SS. 2005. Diel infection of a cyanobacterium by a  
594 contractile bacteriophage. *Appl Environ Microbiol* 71:4276–4279.
- 595 18. Jeanniard A, Dunigan DD, Gurnon JR, Agarkova IV, Kang M, Vitek J, Duncan G,  
596 McClung OW, Larsen M, Claverie J-M, Etten JLV, Blanc G. 2013. Towards

- 597 defining the chloroviruses: a genomic journey through a genus of large DNA  
598 viruses. *BMC Genomics* 14:158.
- 599 19. Nissimov JI, Pagarete A, Ma F, Cody S, Dunigan DD, Kimmance SA, Allen MJ.  
600 2017. Coccolithoviruses: A Review of Cross-Kingdom Genomic Thievery and  
601 Metabolic Thuggery. *Viruses* 9:52.
- 602 20. Baudoux AC, Brussaard CPD. 2008. Influence of irradiance on virus-algal host  
603 interactions. *Journal of Phycology* 44:902–908.
- 604 21. Baudoux A-C, Lebretonchel H, Dehmer H, Latimier M, Edern R, Rigaut-Jalabert F,  
605 Ge P, Guillou L, Foulon E, Bozec Y, Cariou T, Desdevises Y, Derelle E, Grimsley  
606 N, Moreau H, Simon N. 2015. Interplay between the genetic clades of *Micromonas*  
607 and their viruses in the Western English Channel. *Environmental Microbiology*  
608 *Reports* 7:765–773.
- 609 22. Brown CM, Campbell DA, Lawrence JE. 2007. Resource dynamics during infection  
610 of *Micromonas pusilla* by virus MpV-Sp1. *Environmental Microbiology* 9:2720–7.
- 611 23. Brussaard CPD, Thyraug R, Marie D, Bratbak G. 1999. Flow cytometric analyses of  
612 viral infection in two marine phytoplankton species, *Micromonas pusilla*  
613 (Prasinophyceae) and *Phaeocystis pouchetii* (Prymnesiophyceae). *Journal of*  
614 *Phycology* 35:941–948.
- 615 24. Cottrell MT, Suttle CA. 1995. Dynamics of a Lytic Virus Infecting the  
616 Photosynthetic Marine Picoflagellate *Micromonas pusilla*. *Limnology and*  
617 *Oceanography* 40:730–739.

- 618 25. Sahlsten E. 1998. Seasonal abundance in Skagerrak-Kattegat coastal waters and host  
619 specificity of viruses infecting the marine photosynthetic flagellate *Micromonas*  
620 *pusilla*. *Aquat Microb Ecol* 16:103–108.
- 621 26. Waters RE, Chan AT. 1982. *Micromonas pusilla* Virus - the Virus Growth-Cycle and  
622 Associated Physiological Events within the Host-Cells - Host Range Mutation.  
623 *Journal of General Virology* 63:199–206.
- 624 27. Zingone A, Sarno D, Forlani G. 1999. Seasonal dynamics in the abundance of  
625 *Micromonas pusilla* (Prasinophyceae) and its viruses in the Gulf of Naples  
626 (Mediterranean Sea). *Journal of Plankton Research* 21:2143–2159.
- 627 28. Demory D, Arsenieff L, Simon N, Six C, Rigaut-Jalabert F, Marie D, Ge P, Bigeard  
628 E, Jacquet S, Sciandra A, Bernard O, Rabouille S, Baudoux A-C. 2017.  
629 Temperature is a key factor in *Micromonas*–virus interactions. *ISME J* 11:601–612.
- 630 29. Farinas B, Mary C, Manes CLD, Bhaud Y, Peaucellier G, Moreau H. 2006. Natural  
631 synchronisation for the study of cell division in the green unicellular alga  
632 *Ostreococcus tauri*. *Plant Molecular Biology* 60:277–292.
- 633 30. Derelle E, Ferraz C, Rombauts S, Rouzé P, Worden AZ, Robbens S, Partensky F,  
634 Degroeve S, Echeynié S, Cooke R, Saeys Y, Wuyts J, Jabbari K, Bowler C, Panaud  
635 O, Piégu B, Ball SG, Ral J-P, Bouget F-Y, Piganeau G, Baets BD, Picard A,  
636 Delseny M, Demaille J, Peer YV de, Moreau H. 2006. Genome analysis of the  
637 smallest free-living eukaryote *Ostreococcus tauri* unveils many unique features.  
638 *PNAS* 103:11647–11652.



- 639 31. Graves MV, Meints RH. 1992. Characterization of the gene encoding the most  
640 abundant in vitro translation product from virus-infected *Chlorella*-like algae. *Gene*  
641 113:149–155.
- 642 32. Van Etten JL, Burbank DE, Xia Y, Meints RH. 1983. Growth-cycle of a virus,  
643 PBCV-1, that infects *Chlorella*-like algae. *Virology* 126:117–125.
- 644 33. Fitzgerald LA, Graves MV, Li X, Feldblyum T, Nierman WC, Van Etten JL. 2007.  
645 Sequence and annotation of the 369-kb NY-2A and the 345-kb AR158 viruses that  
646 infect *Chlorella* NC64A. *Virology* 358:472–484.
- 647 34. Fitzgerald LA, Graves MV, Li X, Hartigan J, Pfitzner AJP, Hoffart E, Van Etten JL.  
648 2007. Sequence and annotation of the 288-kb ATCV-1 virus that infects an  
649 endosymbiotic *Chlorella* strain of the heliozoon *Acanthocystis turfacea*. *Virology*  
650 362:350–361.
- 651 35. Blanc G, Mozar M, Agarkova IV, Gurnon JR, Yanai-Balser G, Rowe JM, Xia Y,  
652 Riethoven J-J, Dunigan DD, Etten JLV. 2014. Deep RNA Sequencing Reveals  
653 Hidden Features and Dynamics of Early Gene Transcription in *Paramecium*  
654 *bursaria* *Chlorella* Virus 1. *PLOS ONE* 9:e90989.
- 655 36. Rowe JM, Jeanniard A, Gurnon JR, Xia Y, Dunigan DD, Etten JLV, Blanc G. 2014.  
656 Global Analysis of *Chlorella variabilis* NC64A mRNA Profiles during the Early  
657 Phase of *Paramecium bursaria* *Chlorella* Virus-1 Infection. *PLOS ONE* 9:e90988.
- 658 37. Noordally ZB, Millar AJ. 2015. Clocks in Algae. *Biochemistry* 54:171–183.

- 659 38. Ottesen EA, Young CR, Eppley JM, Ryan JP, Chavez FP, Scholin CA, DeLong EF.  
660 2013. Pattern and synchrony of gene expression among sympatric marine microbial  
661 populations. PNAS 110:E488–E497.
- 662 39. Thyrhaug R, Larsen A, Brussaard CPD, Bratbak G. 2002. Cell cycle dependent virus  
663 production in marine phytoplankton. Journal of Phycology 38:338–343.
- 664 40. Maat DS, Crawford KJ, Timmermans KR, Brussaard CPD. 2014. Elevated pCO<sub>2</sub> and  
665 phosphate limitation favor *Micromonas pusilla* through stimulated growth and  
666 reduced viral impact. Appl Environ Microbiol AEM.03639-13.
- 667 41. Maat DS, van Bleijswijk JDL, Witte HJ, Brussaard CPD. 2016. Virus production in  
668 phosphorus-limited *Micromonas pusilla* stimulated by a supply of naturally low  
669 concentrations of different phosphorus sources, far into the lytic cycle. FEMS  
670 MICROBIOLOGY ECOLOGY 92.
- 671 42. Kendrick BJ, DiTullio GR, Cyronak TJ, Fulton JM, Van Mooy BAS, Bidle KD.  
672 2014. Temperature-Induced Viral Resistance in *Emiliana huxleyi*  
673 (Prymnesiophyceae). PLoS One 9:e112134.
- 674 43. Heath SE, Collins S. 2016. Mode of resistance to viral lysis affects host growth  
675 across multiple environments in the marine picoeukaryote *Ostreococcus tauri*.  
676 Environ Microbiol 18:4628–4639.
- 677 44. Kegel JU, Blaxter M, Allen MJ, Metfies K, Wilson WH, Valentin K. 2010.  
678 Transcriptional host–virus interaction of *Emiliana huxleyi* (Haptophyceae) and

- 679 EhV-86 deduced from combined analysis of expressed sequence tags and  
680 microarrays. *European Journal of Phycology* 45:1–12.
- 681 45. Sheyn U, Rosenwasser S, Ben-Dor S, Porat Z, Vardi A. 2016. Modulation of host  
682 ROS metabolism is essential for viral infection of a bloom-forming coccolithophore  
683 in the ocean. *ISME J* 10:1742–1754.
- 684 46. Moulager M, Monnier A, Jesson B, Bouvet R, Mosser J, Schwartz C, Garnier L,  
685 Corellou F, Bouget F-Y. 2007. Light-dependent regulation of cell division in  
686 *Ostreococcus*: evidence for a major transcriptional input. *Plant Physiol* 144:1360–  
687 1369.
- 688 47. Vannini A, Cramer P. 2012. Conservation between the RNA Polymerase I, II, and III  
689 Transcription Initiation Machineries. *Molecular Cell* 45:439–446.
- 690 48. Hildebrandt TM, Nunes Nesi A, Araújo WL, Braun H-P. 2015. Amino Acid  
691 Catabolism in Plants. *Molecular Plant* 8:1563–1579.
- 692 49. Pandhare J, Cooper SK, Donald SP, Phang JM. 2009. Regulation and Function of  
693 Proline Oxidase under Nutrient Stress. *J Cell Biochem* 107:759–768.
- 694 50. Nielsen TH, Rung JH, Villadsen D. 2004. Fructose-2,6-bisphosphate: a traffic signal  
695 in plant metabolism. *Trends in Plant Science* 9:556–563.
- 696 51. Zhuang Y, Zhang H, Lin S, Wood AM. 2013. Polyadenylation of 18S r RNA in  
697 algae1. *Journal of Phycology* 49:570–579.

- 698 52. Antal M, Mougin A, Kis M, Boros E, Steger G, Jakab G, Solymosy F, Branlant C.  
699 2000. Molecular characterization at the RNA and gene levels of U3 snoRNA from a  
700 unicellular green alga, *Chlamydomonas reinhardtii*. *Nucleic Acids Res* 28:2959–  
701 2968.
- 702 53. Kass S, Tyc K, Steitz JA, Sollner-Webb B. 1990. The U3 small nucleolar  
703 ribonucleoprotein functions in the first step of preribosomal RNA processing. *Cell*  
704 60:897–908.
- 705 54. Dieci G, Fiorino G, Castelnuovo M, Teichmann M, Pagano A. 2007. The expanding  
706 RNA polymerase III transcriptome. *Trends in Genetics* 23:614–622.
- 707 55. Vannini A, Ringel R, Kusser AG, Berninghausen O, Kassavetis GA, Cramer P. 2010.  
708 Molecular Basis of RNA Polymerase III Transcription Repression by Maf1. *Cell*  
709 143:59–70.
- 710 56. Zhu J, Liu X, Anjos M, Correll CC, Johnson AW. 2016. Utp14 Recruits and  
711 Activates the RNA Helicase Dhr1 To Undock U3 snoRNA from the Preribosome.  
712 *Mol Cell Biol* 36:965–978.
- 713 57. Lafontaine DLJ, Tollervey D. 2001. The function and synthesis of ribosomes. *Nat*  
714 *Rev Mol Cell Biol* 2:514–520.
- 715 58. Honma Y, Kitamura A, Shioda R, Maruyama H, Ozaki K, Oda Y, Mini T, Jenö P,  
716 Maki Y, Yonezawa K, Hurt E, Ueno M, Uritani M, Hall MN, Ushimaru T. 2006.  
717 TOR regulates late steps of ribosome maturation in the nucleoplasm via Nog1 in  
718 response to nutrients. *The EMBO Journal* 25:3832–3842.

- 719 59. Kos-Braun IC, Jung I, Koš M. 2017. Tor1 and CK2 kinases control a switch between  
720 alternative ribosome biogenesis pathways in a growth-dependent manner. PLOS  
721 Biology 15:e2000245.
- 722 60. Le Bihan T, Hindle M, Martin SF, Barrios-Llerena ME, Krahmer J, Kis K, Millar AJ,  
723 van Ooijen G. 2015. Label-free quantitative analysis of the casein kinase 2-  
724 responsive phosphoproteome of the marine minimal model species *Ostreococcus*  
725 *tauri*. Proteomics 15:4135–4144.
- 726 61. Sanz-Luque E, Chamizo-Ampudia A, Llamas A, Galvan A, Fernandez E. 2015.  
727 Understanding nitrate assimilation and its regulation in microalgae. Front Plant Sci  
728 6.
- 729 62. Caló G, Scheidegger D, Martínez-Noël GMA, Salerno GL. 2017. Ancient signal for  
730 nitrogen status sensing in the green lineage: Functional evidence of CDPK  
731 repertoire in *Ostreococcus tauri*. Plant Physiology and Biochemistry 118:377–384.
- 732 63. Frungillo L, Spoel SH, Salgado I. 2016. Chapter Four - Control of Nitrogen  
733 Assimilation in Plants through S-nitrosothiols, p. 55–78. In Wendehenne, D (ed.),  
734 Advances in Botanical Research. Academic Press.
- 735 64. Medina-Andrés R, Solano-Peralta A, Saucedo-Vázquez JP, Napsucialy-Mendivil S,  
736 Pimentel-Cabrera JA, Sosa-Torres ME, Dubrovsky JG, Lira-Ruan V. 2015. The  
737 Nitric Oxide Production in the Moss *Physcomitrella patens* Is Mediated by Nitrate  
738 Reductase. PLOS ONE 10:e0119400.

- 739 65. Cánovas D, Marcos JF, Marcos AT, Strauss J. 2016. Nitric oxide in fungi: is there  
740 NO light at the end of the tunnel? *Curr Genet* 62:513–518.
- 741 66. Domingos P, Prado AM, Wong A, Gehring C, Feijo JA. 2015. Nitric Oxide: A  
742 Multitasked Signaling Gas in Plants. *Molecular Plant* 8:506–520.
- 743 67. Chamizo-Ampudia A, Sanz-Luque E, Llamas A, Galvan A, Fernandez E. 2017.  
744 Nitrate Reductase Regulates Plant Nitric Oxide Homeostasis. *Trends in Plant*  
745 *Science* 22:163–174.
- 746 68. Farnese FS, Menezes-Silva PE, Gusman GS, Oliveira JA. 2016. When Bad Guys  
747 Become Good Ones: The Key Role of Reactive Oxygen Species and Nitric Oxide in  
748 the Plant Responses to Abiotic Stress. *Front Plant Sci* 471.
- 749 69. Jian W, Zhang D, Zhu F, Wang S, Zhu T, Pu X, Zheng T, Feng H, Lin H. 2015.  
750 Nitrate reductase-dependent nitric oxide production is required for regulation  
751 alternative oxidase pathway involved in the resistance to Cucumber mosaic virus  
752 infection in Arabidopsis. *Plant Growth Regul* 77:99–107.
- 753 70. Wu J, Yang R, Yang Z, Yao S, Zhao S, Wang Y, Li P, Song X, Jin L, Zhou T, Lan Y,  
754 Xie L, Zhou X, Chu C, Qi Y, Cao X, Li Y. 2017. ROS accumulation and antiviral  
755 defence control by microRNA528 in rice. *Nature Plants* 3:16203.
- 756 71. Clasen JL, Elser JJ. 2007. The effect of host *Chlorella* NC64A carbon : phosphorus  
757 ratio on the production of *Paramecium bursaria* *Chlorella* Virus-1. *Freshwater*  
758 *Biology* 52:112–122.

- 759 72. Zvereva AS, Golyaev V, Turco S, Gubaeva EG, Rajeswaran R, Schepetilnikov MV,  
760 Srour O, Ryabova LA, Boller T, Pooggin MM. 2016. Viral protein suppresses  
761 oxidative burst and salicylic acid-dependent autophagy and facilitates bacterial  
762 growth on virus-infected plants. *New Phytologist* 211:1020–1034.
- 763 73. Popa C, Li L, Gil S, Tatjer L, Hashii K, Tabuchi M, Coll NS, Ariño J, Valls M. 2016.  
764 The effector AWR5 from the plant pathogen *Ralstonia solanacearum* is an inhibitor  
765 of the TOR signalling pathway. *Scientific Reports* 6:27058.
- 766 74. Dobrenel T, Caldana C, Hanson J, Robaglia C, Vincentz M, Veit B, Meyer C. 2016.  
767 TOR Signaling and Nutrient Sensing. *Annual Review of Plant Biology* 67:261–285.
- 768 75. Monier A, Chambouvet A, Milner DS, Attah V, Terrado R, Lovejoy C, Moreau H,  
769 Santoro AE, Derelle É, Richards TA. 2017. Host-derived viral transporter protein  
770 for nitrogen uptake in infected marine phytoplankton. *PNAS* 201708097.
- 771 76. Albright ER, Kalejta RF. 2016. Canonical and Variant Forms of Histone H3 Are  
772 Deposited onto the Human Cytomegalovirus Genome during Lytic and Latent  
773 Infections. *J Virol* 90:10309–10320.
- 774 77. Wang GZ, Wang Y, Goff SP. 2016. Histones Are Rapidly Loaded onto Unintegrated  
775 Retroviral DNAs Soon after Nuclear Entry. *Cell Host & Microbe* 20:798–809.
- 776 78. Knipe DM, Lieberman PM, Jung JU, McBride AA, Morris KV, Ott M, Margolis D,  
777 Nieto A, Nevels M, Parks RJ, Kristie TM. 2013. Snapshots: Chromatin control of  
778 viral infection. *Virology* 435:141–156.

- 779 79. Oh J, Sanders IF, Chen EZ, Li H, Tobias JW, Isett RB, Penubarthi S, Sun H, Baldwin  
780 DA, Fraser NW. 2015. Genome Wide Nucleosome Mapping for HSV-1 Shows  
781 Nucleosomes Are Deposited at Preferred Positions during Lytic Infection. PLOS  
782 ONE 10:e0117471.
- 783 80. Gibeault RL, Conn KL, Bildersheim MD, Schang LM. 2016. An Essential Viral  
784 Transcription Activator Modulates Chromatin Dynamics. PLOS Pathogens  
785 12:e1005842.
- 786 81. Monnier A, Liverani S, Bouvet R, Jesson B, Smith J, Mosser J, Corellou F, Bouget F.  
787 2010. Orchestrated transcription of biological processes in the marine picoeukaryote  
788 *Ostreococcus* exposed to light/dark cycles. BMC GENOMICS 11.
- 789 82. Loenen W a. M. 2006. S-Adenosylmethionine: jack of all trades and master of  
790 everything? Biochemical Society Transactions 34:330–333.
- 791 83. Blanc-Mathieu R, Verhelst B, Derelle E, Rombauts S, Bouget F-Y, Carré I, Château  
792 A, Eyre-Walker A, Grimsley N, Moreau H, Piégu B, Rivals E, Schackwitz W, Peer  
793 YV de, Piganeau G. 2014. An improved genome of the model marine alga  
794 *Ostreococcus tauri* unfolds by assessing Illumina de novo assemblies. BMC  
795 Genomics 15:1103.
- 796 84. Yau S, Hemon C, Derelle E, Moreau H, Piganeau G, Grimsley N. 2016. A Viral  
797 Immunity Chromosome in the Marine Picoeukaryote, *Ostreococcus tauri*. PLOS  
798 Pathog 12:e1005965.



- 799 85. Wang M, Lai E. 1995. Pulsed field separation of large supercoiled and open-circular  
800 DNAs and its application to bacterial artificial chromosome cloning. *Electrophoresis*  
801 16:1–7.
- 802 86. Møller HD, Larsen CE, Parsons L, Hansen AJ, Regenber B, Mourier T. 2016.  
803 Formation of Extrachromosomal Circular DNA from Long Terminal Repeats of  
804 Retrotransposons in *Saccharomyces cerevisiae*. *G3* 6:453–462.
- 805 87. Lanciano S, Carpentier M-C, Llauro C, Jobet E, Robakowska-Hyzorek D, Lasserre E,  
806 Ghesquière A, Panaud O, Mirouze M. 2017. Sequencing the extrachromosomal  
807 circular mobilome reveals retrotransposon activity in plants. *PLOS Genetics*  
808 13:e1006630.
- 809 88. Blanc-Mathieu R, Krasovec M, Hebrard M, Yau S, Desgranges E, Martin J,  
810 Schackwitz W, Kuo A, Salin G, Donnadiou C, Desdevises Y, Sanchez-Ferandin S,  
811 Moreau H, Rivals E, Grigoriev IV, Grimsley N, Eyre-Walker A, Piganeau G. 2017.  
812 Population genomics of picophytoplankton unveils novel chromosome  
813 hypervariability. *Sci Adv* 3.
- 814 89. Courties C, Vaquer A, Troussellier M, Lautier J, Chretiennotdinet MJ, Neveux J,  
815 Machado C, Claustre H. 1994. Smallest Eukaryotic Organism. *Nature* 370:255.
- 816 90. Trask BJ, van den Engh GJ, Elgershuizen JH. 1982. Analysis of phytoplankton by  
817 flow cytometry. *Cytometry* 2:258–64.
- 818 91. Brussaard CPD. 2004. Optimization of procedures for counting viruses by flow  
819 cytometry. *Applied and Environmental Microbiology* 70:1506–1513.

- 820 92. Kim D, Pertea G, Trapnell C, Pimentel H, Kelley R, Salzberg SL. 2013. TopHat2:  
821 accurate alignment of transcriptomes in the presence of insertions, deletions and  
822 gene fusions. *Genome Biol* 14:1–13.
- 823 93. Anders S, Pyl PT, Huber W. 2015. HTSeq—a Python framework to work with high-  
824 throughput sequencing data. *Bioinformatics* 31:166–169.

825

### 826 ***Acknowledgments***

827 We thank D. Pecqueur and S. Salmeron for use of the of the cytometry platform, Céline  
828 Noirot (Genotoul platform, Toulouse) for advice on data analysis, and the GENOPHY  
829 team (Banyuls sur Mer) for discussions. We are grateful for financial support from the  
830 French National Resaerch Agency (grants REVIREC ANR-12-BSV7-0006-01 and  
831 DECOVIR ANR-12-BSV7-0009).

832

### 833 ***Author contributions***

834 HM & ED planned the experiments, ED did experimental work, ED and SY did  
835 bioinformatic analyses, all authors were involved in interpreting the results, NG, SY and  
836 HM wrote the article.

837

### 838 ***Additional information***

839 Supplemental information is available online. Correspondence and requests for materials  
840 should be addressed to H.M. or N.H.G.

841

### 842 ***Competing interests***

843 The authors declare no competing financial interests.

844

845 **Figure legends**

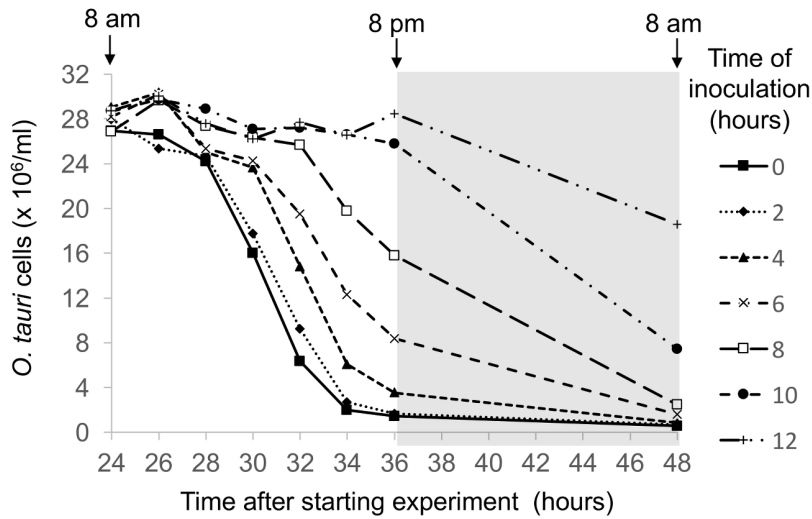

846  
 847 **Fig. 1** Time course of lysis of *O. tauri* cultures partially synchronized by a 12:12  
 848 light:dark cycle and inoculated with OtV5 (MOI 5) at different times during the previous  
 849 day, as indicated in the adjacent key. Note that almost complete lysis of cells occurred at  
 850 36 hours post inoculation (hpi) only when cultures were inoculated on the previous day at  
 851 8 am (time zero, filled squares with continuous line) or 10 am (time 2, fine dotted line  
 852 with filled diamonds).

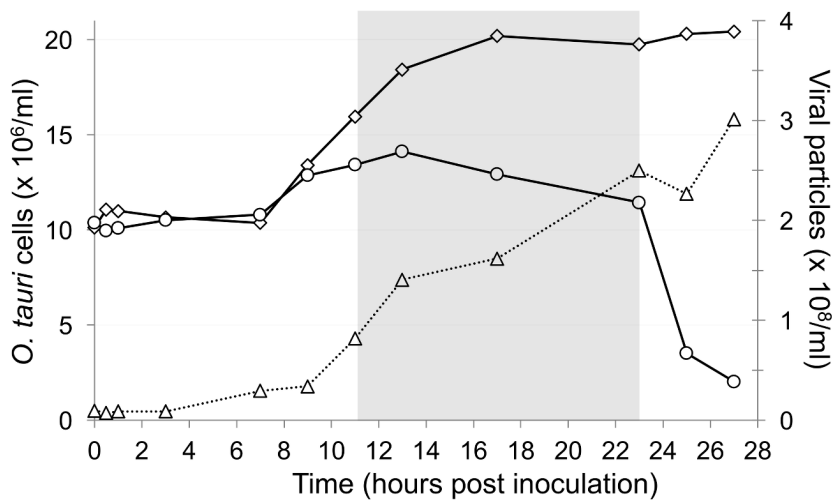

853  
 854 **Fig. 2.** Growth curves of *O. tauri* cultures and OtV5. Open diamonds: uninfected  
 855 *O. tauri*, open circles: *O. tauri* infected by OtV5 and open triangles: OtV5 production.

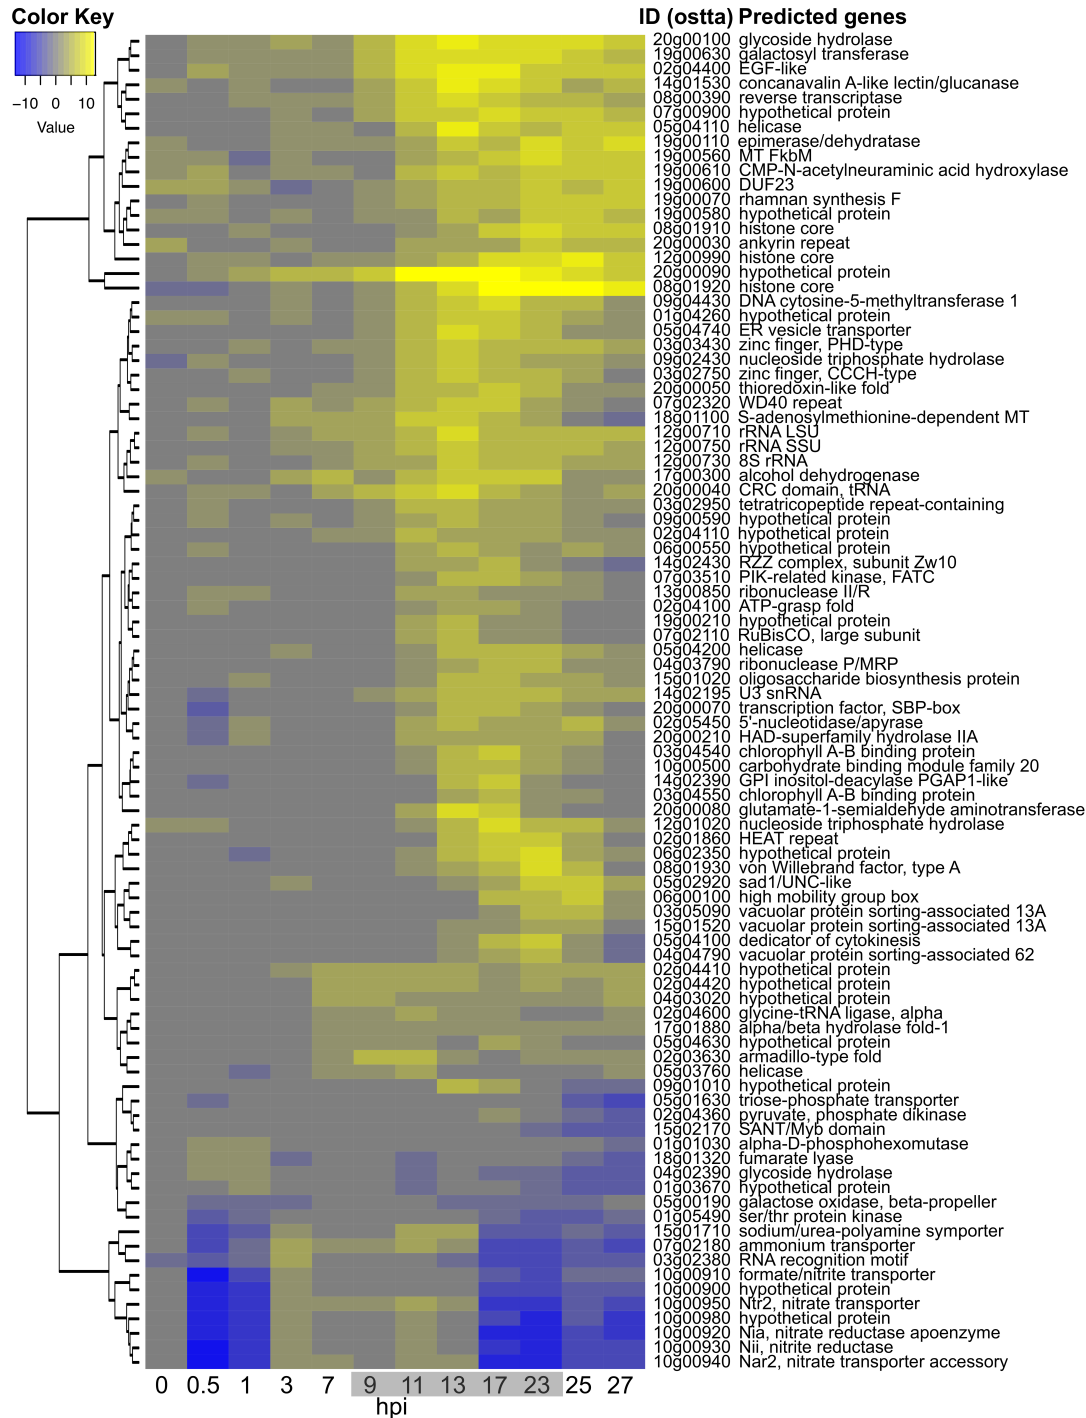

856

857 **Fig. 3.** Differentially transcribed *O. tauri* genes during a 27-hour infection time course.

858 Time (hpi) is shown along the abscissa, with time points sampled in the dark shown with

859 a grey background, and rows represent DE genes clustered according to log2-fold

860 changes in expression (Color Key)(see Supplemental Table S2 for a detailed list of

861 genes).

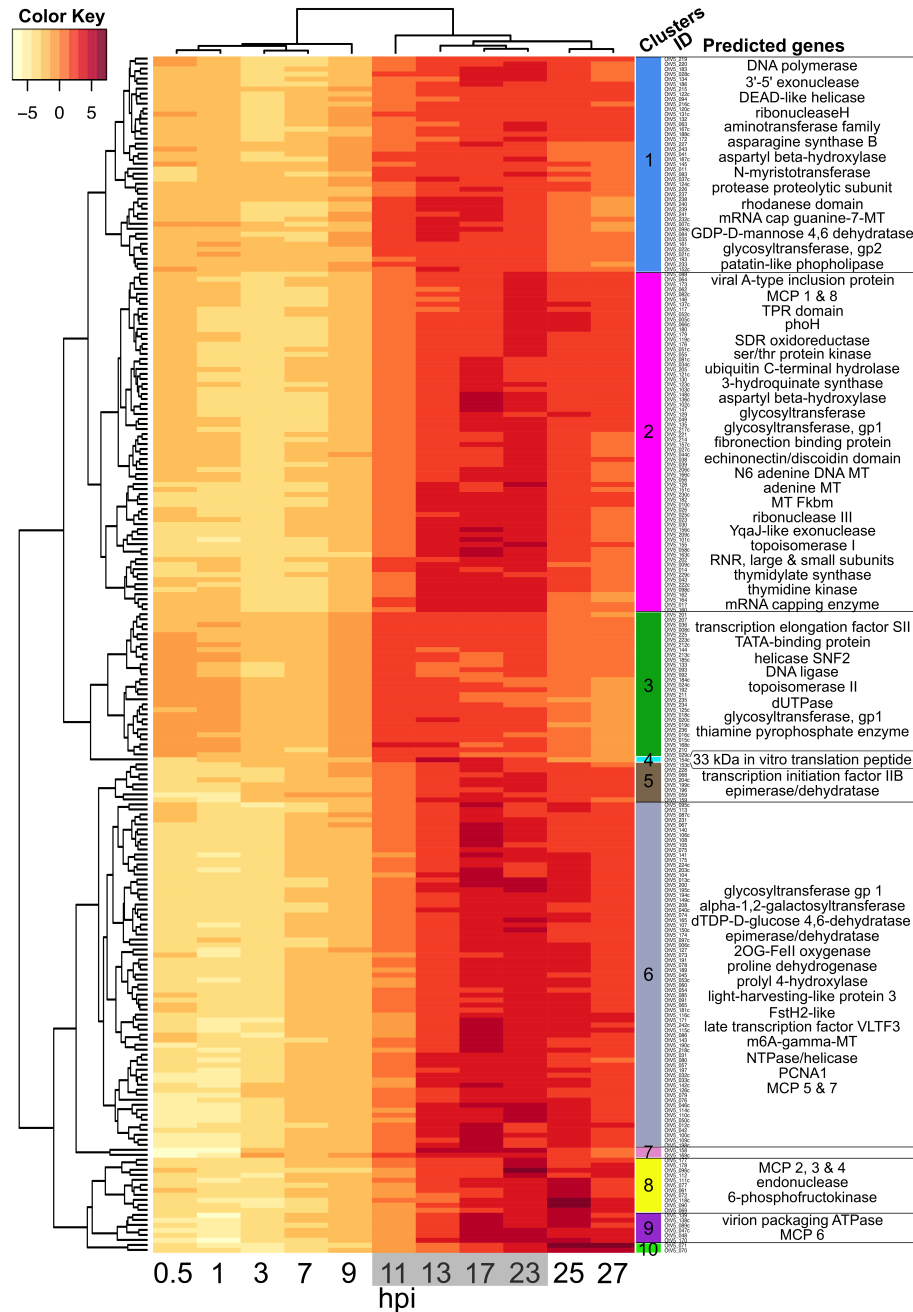

862

863 **Fig. 4.** Timing of OtV5 relative gene transcription during infection. Time (hpi) is shown  
 864 along the abscissa, with time points sampled in the dark shown with a grey background.  
 865 Rows represent OtV5 genes clustered according to the variation in their relative  
 866 expression the over time (left dendrogram) and by the relative expression pattern of each  
 867 sample (above dendrogram). The colour key shows regularised log (rlog) transformed  
 868 gene fragment counts centred to the mean of each gene (row means). (see "Methods" and  
 869 Supplemental Table S3 for a detailed list of genes).

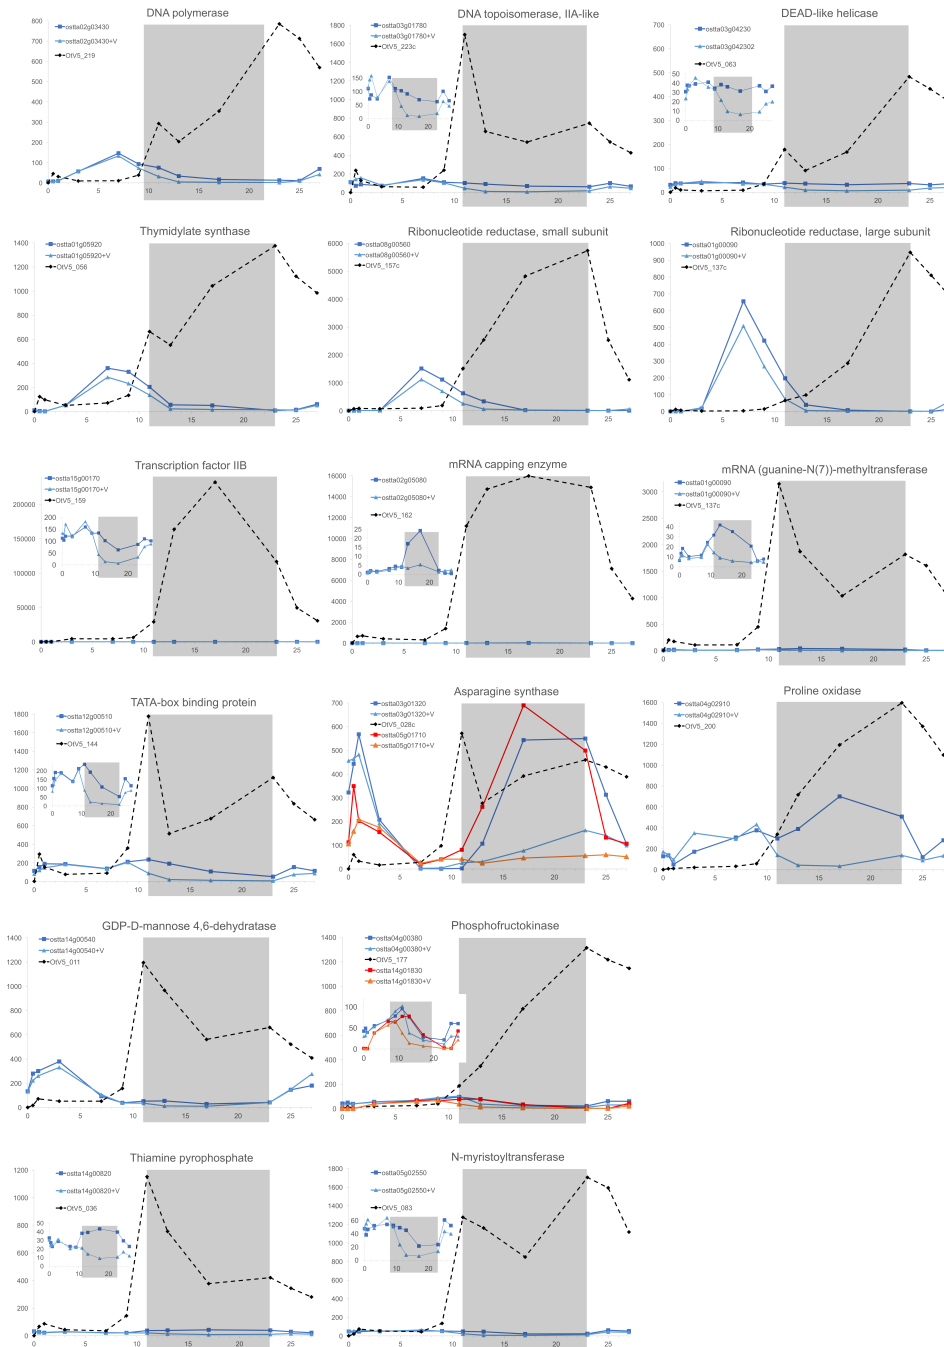

870

871 **Fig. 5.** Expression (ordinates: FPKM) of healthy (square data points, darker colours),  
 872 infected (triangular data points, lighter colours) *O. tauri* and OtV5 (diamonds, dashed  
 873 lines) genes sharing a similar putative function. Abscissae: time (hours post-inoculation).  
 874 Inoculation with the virus was done at  $t = 0$ , one hour after daytime (light) started. The  
 875 grey shaded area indicates the night (dark) period. Genes are identified by their accession  
 876 numbers in public databases (top left in each panel, +V: virus-inoculated cultures).

877 **Supplemental Fig. S1**

878 A: Visualisation of *O. tauri* cells by flow cytometry in healthy (control) or infected  
879 (inoculated at 0 hpi) from samples taken at different times during host and viral growth  
880 during the RNA-Seq analysis. Healthy *O. tauri* cells are seen as red fluorescent points  
881 clustering in the window shown, whereas lysing cells can be seen as dark points  
882 underneath the window with reduced fluorescence and side scatter that begin to appear in  
883 infected cultures at 9 hpi, becoming suddenly stronger at 25 hpi and rising to maximum at  
884 27 hpi.

885 B: Electropherograms of RNA extractions from in healthy (control) or infected  
886 (inoculated at 0 hpi) cultures on an Agilent 2100 Bioanalyzer, dark bands showing  
887 mainly abundant ribosomal RNAs. In infected cultures the extracted RNA is partly  
888 degraded after 23-27 hpi, when most of the host cells are lysing. M – molecular weight  
889 marker track.

890

891 **Supplemental Fig. S2.** Distribution of *O tauri* differentially transcribed genes across the  
892 genome. Numbers underneath chromosome numbers indicate the number of genes  
893 encoded by that chromosome. Large black rectangles represent chromosomes, each  
894 rectangle being a composite view of the 12 time points during the OtV5 infection stacked  
895 from bottom to top. On chromosome 10, for example, the nitrogen simulation cluster of  
896 genes (blue arrowhead) can be seen as under-expressed (green), then over expressed  
897 (red), then under expressed in the final stages, reading from bottom to top of the  
898 rectangle.

899

900 **Supplemental Fig. S3**

901 The distribution of transcript abundance (FPKM) of OtV5 genes during the time course  
902 of infection (hpi shown on right). The OtV5 genome is represented from left to right, one  
903 gene per column on the heat map. Six out of 8 of the genes in the terminal inverted  
904 repeats (TIR) were not expressed, so that blue columns appear at genome extremities.

905

906

907 **Tables**

908

909 Table 1. Numbers of differentially expressed *O. tauri* genes.

|                                       | Total | Up  | Down | Up and down |
|---------------------------------------|-------|-----|------|-------------|
| Total                                 | 323   | 230 | 63   | 30          |
| DE only once                          | 207   | 151 | 56   | 0           |
| DE at least two non-consecutive times | 24    | 7   | 2    | 15          |
| DE at least two consecutive times     | 92    | 72  | 5    | 15          |

910 DE: differentially expressed, Up: all DE genes were up-regulated, Down: all DE genes were  
911 down-regulated, Up and Down: regulation of DE genes varied across the time course.

912

913

914 **Supplemental Table 1**

915 Host genes differentially expressed once or more between control and infected cultures at  
916 different times after inoculation. Log<sub>2</sub>-fold changes are shown only if the number of raw reads  
917 exceeds 100 in both control and infected treatments.

918 *See Excel spreadsheet*

919

920 **Supplemental Table S2**

921 Host genes differentially expressed at least 2 consecutive time points between control and  
922 infected cultures. Log<sub>2</sub>-fold ratios and FPKM values are shown for all time points.

923 *See Excel spreadsheet*

924

925 **Supplemental Table S3**

926 Expression of OtV5 genes at different time points during the infection, grouped according their  
927 expression profiles (see also Fig. 4 and Methods). The genes in TIRs (4 genes at each end of the  
928 genome) showed no or negligible expression and were not included.

929 *See Excel spreadsheet*

930

931 **Supplemental Table S4**

932 Transcript abundances (FPKM) for all host genes at different times in healthy control cultures  
933 (light blue background) and cultures inoculated with OtV5 at time zero (light red background).

934 *See Excel spreadsheet*

935
